# Supplementary material for: Milder forms of muscular dystrophy associated with POMGNT2 mutations
Source: PubMed Central journal article supplement — Neurol Genet. 2015 Dec 10;1(4):e33. doi: 10.1212/NXG.0000000000000033 (PMC4811383; doi:10.1212/nxg.0000000000000033), 2015-12-10
Supplement: supp_1.4.e33_Table_e-1.pdf [file supp_1.4.e33_Table_e-1.pdf]

Table e-1 Antibodies used in this study

| Antigen                      | Antibody name | Provider         | Dilution |
|------------------------------|---------------|------------------|----------|
| Antibodies for WB, LOL       |               |                  |          |
| $\beta$ -dystroglycan        | NCL-b-DG      | Leica Biosystems | 1/500    |
| $\alpha$ -dystroglycan       | IIH6          | Chemicon         | 1/200    |
| $\alpha$ -dystroglycan       | GT20ADG       | Campbell lab     | 1/300    |
| laminin A2                   | L9393         | Sigma            | 1/300    |
| Antibodies for cell staining |               |                  |          |
| c-Myc                        | 9E10          | Santacruz        | 1/500    |
| PDI                          | P7496         | Sigma            | 1/200    |
